# Supplementary material
Source: PubMed Central journal article supplement (PMC514480)

Males

Females

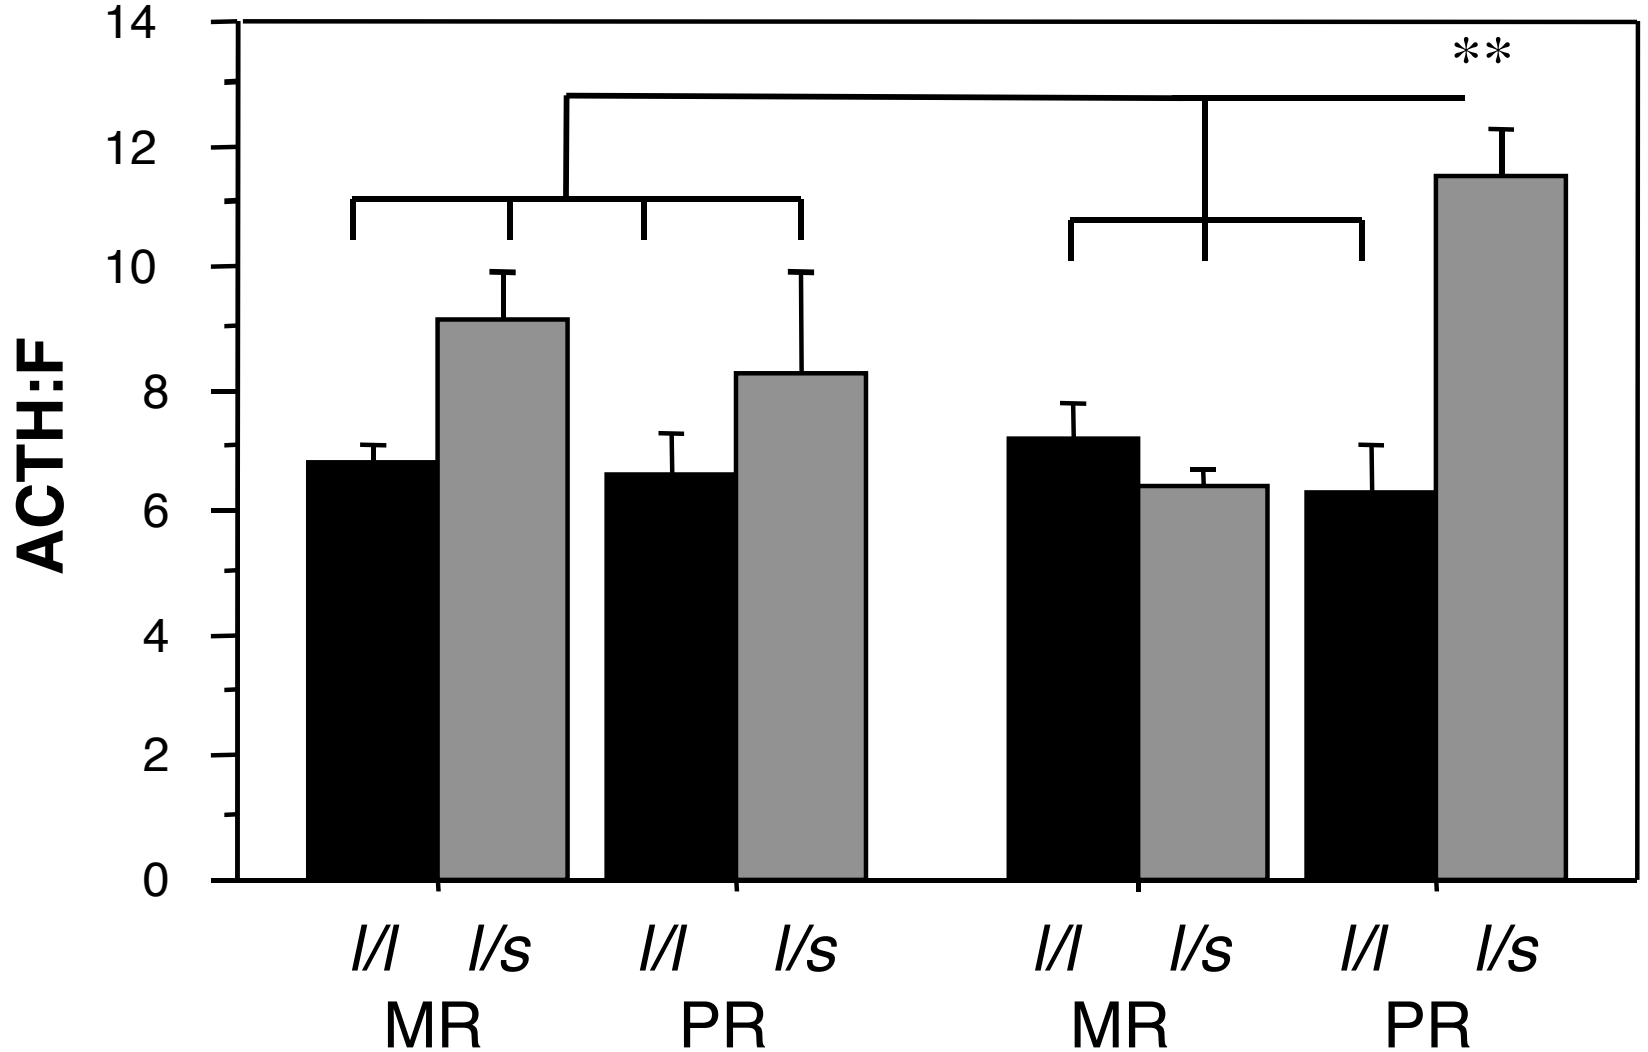

Supplement: pnas_101_33_12358__1.pdf [file pnas_101_33_12358__1.pdf]
